# Supplementary material for: Extended Phylogeny and Extraintestinal Virulence Potential of Commensal Escherichia coli from Piglets and Sows
Source: PubMed Central journal article supplement (PMC6981902; doi:10.3390/ijerph17010366), 2020-01-06
Supplement: ijerph-17-00366-s001.pdf [file ijerph-17-00366-s001.pdf]

**Table S1.** Comparison of phylogenetic structure of *E. coli* isolates from piglets and sows using previous and revised Clermont phylogenetic typing method.

| Number (%) of <i>E. coli</i> isolates within phylogenetic groups |           |           |         |                      |           |           |         |         |         |           |           |         |         |
|------------------------------------------------------------------|-----------|-----------|---------|----------------------|-----------|-----------|---------|---------|---------|-----------|-----------|---------|---------|
| Clermont Scheme 2000                                             |           |           |         | Clermont Scheme 2013 |           |           |         |         |         |           |           |         |         |
|                                                                  | A         | B1        | B2      | D                    | A         | B1        | B2      | C       | D       | E         | F         | Clade I | NT      |
| piglets                                                          | 29 (26.3) | 54 (48.2) | 7 (7.3) | 20 (18.2)            | 24 (21.8) | 53 (48.2) | 5 (4.5) | 6 (5.5) | 3 (2.7) | 12 (10.9) | 3 (2.7)   | -       | 4 (3.6) |
| sows                                                             | 89 (54.3) | 36 (22)   | 5 (3)   | 34 (20)              | 79 (48.2) | 38 (23.2) | 4 (2.4) | -       | 8 (4.9) | 3 (1.8)   | 20 (12.2) | 4 (2.4) | 8 (4.9) |
